# Supplementary material for: Secretor status is a modifier of vaginal microbiota-associated preterm birth risk
Source: PubMed Central journal article supplement (PMC11616779; doi:10.1099/mgen.0.001323), 2024-12-04
Supplement: mgen-10-01323-s001.pdf [file mgen-10-01323-s001.pdf]

1 **Supplementary Information**

2

3 **Secretor status is a modifier of vaginal microbiota-associated preterm birth risk**

4 Samit Kundu<sup>1+</sup>, Gonçalo dos Santos Correia<sup>1,2+</sup>, Yun S Lee<sup>1</sup>, Sherrienne Ng<sup>1,2</sup>, Lynne  
5 Sykes<sup>1,2</sup>, Denise Chan<sup>2</sup>, Holly Lewis<sup>2</sup>, Richard G Brown<sup>2</sup>, Lindsay Kindinger<sup>2,3</sup>, Anne  
6 Dell<sup>1,4</sup>, Ten Feizi<sup>1,5</sup>, Stuart M Haslam<sup>1,4</sup>, Yan Liu<sup>1,5</sup>, Julian R Marchesi<sup>1,6</sup>, David A  
7 MacIntyre<sup>1,2,7\*</sup> and Phillip R Bennett<sup>1,2</sup>

8

9 <sup>1</sup>March of Dimes European Prematurity Research Centre, Imperial College London

10 <sup>2</sup>Institute for Reproductive and Developmental Biology, Imperial College London,  
11 Hammersmith Hospital Campus, London W12 0NN, United Kingdom

12 <sup>3</sup>Institute for Women's Health, University College London, London, UK

13 <sup>4</sup>Department of Life Sciences, Imperial College London, London, UK

14 <sup>5</sup>Glycosciences Laboratory, Department of Metabolism Digestion and Reproduction,  
15 Imperial College London, London, UK

16 <sup>6</sup>Division of Digestive Medicine, Department of Metabolism, Digestion and  
17 Reproduction, Faculty of Medicine, Imperial College London, UK.

18 <sup>7</sup>Robinson Research Institute, University of Adelaide, Australia

19 <sup>+</sup>These authors contributed equally to this work

20 <sup>\*</sup>Correspondence to Prof. D.A. MacIntyre ([d.macintyre@imperial.ac.uk](mailto:d.macintyre@imperial.ac.uk))

21

22

23

24

25

26 **Supplementary Figures**

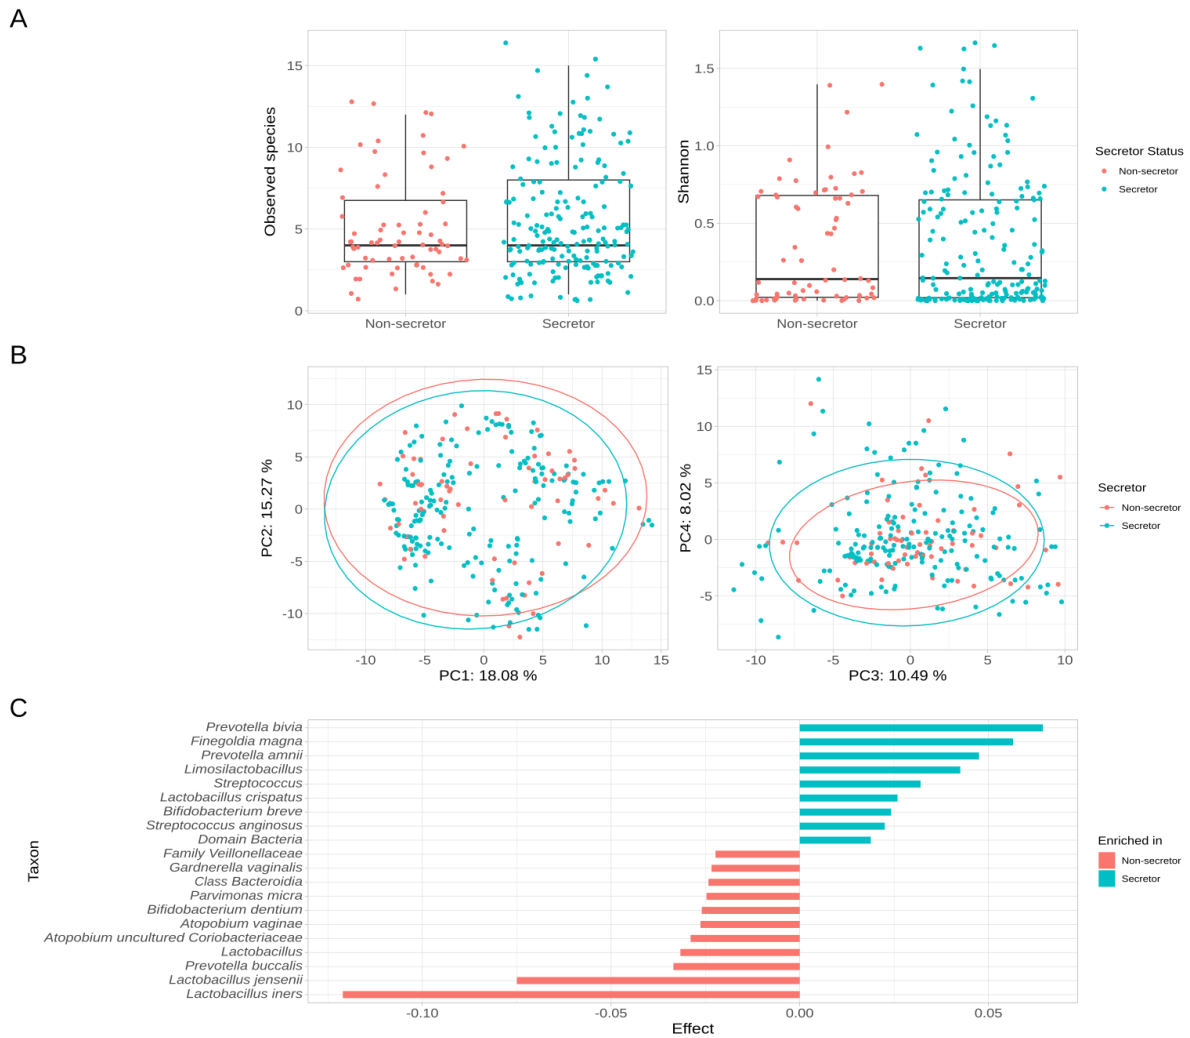

27

28 **Figure S1. Secretors and non-secretors have similar vaginal microbiota profiles**

29 **in early pregnancy. (a)** Distribution of diversity estimates of the vaginal microbiota in

30 secretors and non-secretors in early pregnancy. **(b)** PCA of the vaginal microbial

31 community in early pregnancy shows no significant difference (first four principal

32 components plotted). **(c)** Differential Abundance Analyses indicated only small and

33 non-significant differences between secretors and non-secretors in the top 20

34 microbial taxa by effect size, in the early pregnancy microbiota.

35

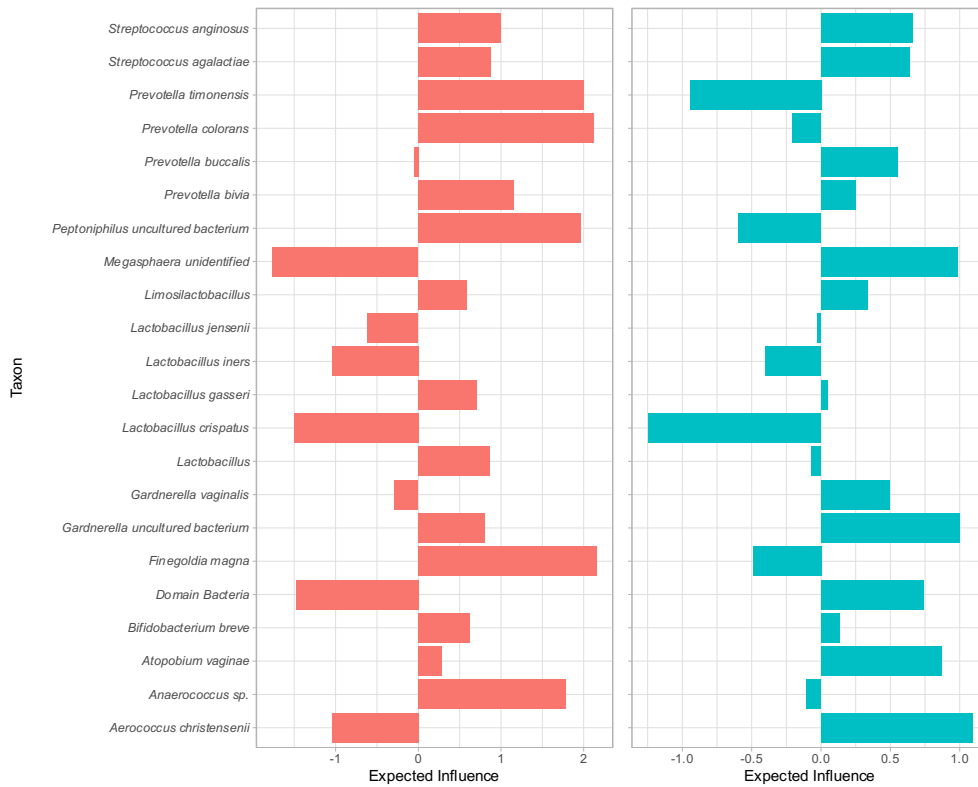

36

37 **Figure S2.** Distribution of nodes with the most positive and negative Expected  
 38 Influence values (scaled) in non-secretors (red) and secretors (blue) calculated for  
 39 vaginal microbiome samples taken in early pregnancy.

40

41

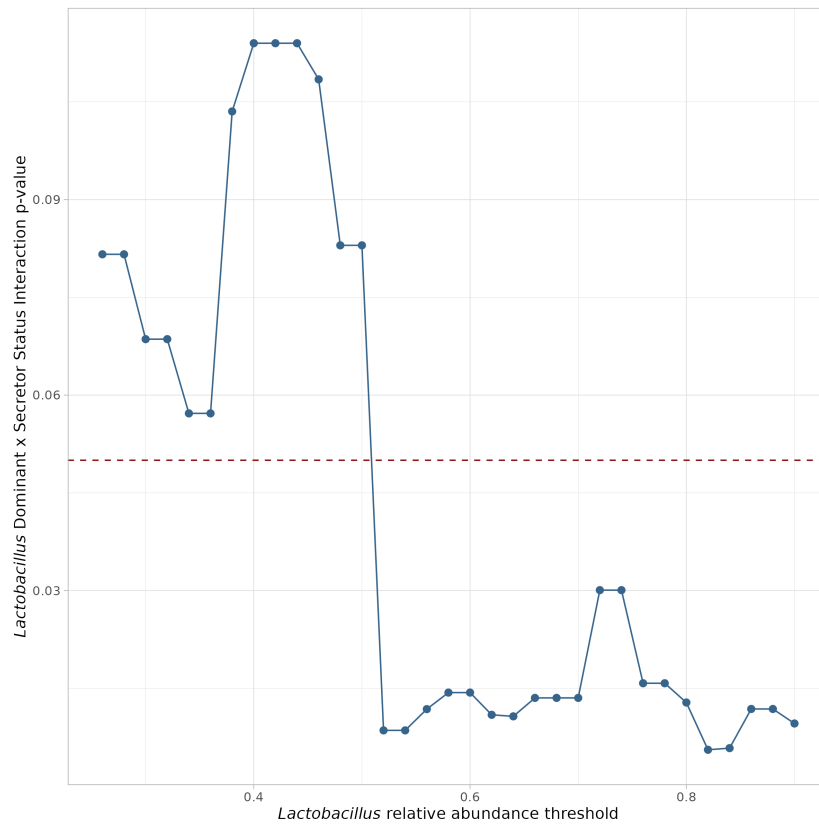

42  
 43  
 44  
 45  
 46

**Figure S3.** Sensitivity analysis of the impact of *Lactobacillus* relative abundance threshold to separate *L. Dominant* from *L. Depleted* cases on the *p-value* for the Secretor Status x *Lactobacillus* interaction in the early gestational period.

47 **Supplementary Tables**

48 **Table S1.** Clinical characteristics and inferred secretor status of the study cohort.  
 49 Sample sizes (number of pregnancies) and percentages (in brackets) are shown.  
 50 Women (n=302) were sampled up to three times throughout pregnancy (Early: 63 –  
 51 131 days [n=263, median of 106], Mid:133 – 178 days [n=264, median of 150] and  
 52 Late: 183 – 251 [n=238, median of 214]). Secretor status was inferred from the  
 53 presence of previously documented nonsense and missense mutations  
 54 (heterozygotes were assumed to be secretors). \*1 Preterm birth. \*2 Mid trimester loss.

| Variable                                      |                                        | Secretor (n=219) | Non-secretor (n=83) |
|-----------------------------------------------|----------------------------------------|------------------|---------------------|
| Mean±SD gestational length in days            |                                        | 262 ± 27         | 262 ± 29            |
| Pregnancy outcome                             | Term (> 37 weeks)                      | 157 (72%)        | 63 (76%)            |
|                                               | Moderate to late preterm (32-37 weeks) | 42 (19%)         | 11 (13%)            |
|                                               | Very preterm (28-32 weeks)             | 10 (4.6%)        | 5 (6.0%)            |
|                                               | Extremely preterm (< 28 weeks)         | 10 (4.6%)        | 4 (4.8%)            |
| Mean±SD maternal age in years                 |                                        | 32.8 ± 4.7       | 33.9 ± 5.1          |
| Total number of swabs collected               | 1                                      | 19               | 9                   |
|                                               | 2                                      | 57               | 28                  |
|                                               | 3                                      | 143              | 46                  |
| Previous PTB <sup>*1</sup> /MTL <sup>*2</sup> | Yes                                    | 95 (43%)         | 32 (39%)            |
|                                               | No                                     | 122 (56%)        | 46 (55%)            |
|                                               | Unknown                                | 2 (0.9%)         | 5 (6%)              |
| Previous cervical excisional treatment        | Yes                                    | 76 (35%)         | 28 (34%)            |
|                                               | No                                     | 143 (65%)        | 55 (72%)            |
| Cervical stitch                               | Yes                                    | 76 (35%)         | 24 (29%)            |
|                                               | No                                     | 146 (67%)        | 59 (71%)            |
| BMI                                           | <18.5                                  | 4 (1.8%)         | 0 (0%)              |
|                                               | 18.5-24.99                             | 115 (53%)        | 49 (59%)            |
|                                               | 25.0-29.99                             | 63 (29%)         | 21 (25%)            |
|                                               | >30.0                                  | 37 (17%)         | 13 (16%)            |
| Ethnicity                                     | White                                  | 132 (60%)        | 55 (66%)            |
|                                               | Asian                                  | 30 (14%)         | 11 (13%)            |
|                                               | Black                                  | 46 (21%)         | 16 (19%)            |
|                                               | Arab                                   | 5 (2.3%)         | 1 (1.2%)            |
|                                               | Mixed/Other                            | 6 (2.7%)         | 0 (0%)              |

56 **Table S2.** Number of samples (swabs) available and outcome distribution per  
 57 timepoint.

| Outcome                                   | Non-secretor  |             |              | Secretor       |              |               |
|-------------------------------------------|---------------|-------------|--------------|----------------|--------------|---------------|
|                                           | Early<br>(70) | Mid<br>(72) | Late<br>(61) | Early<br>(192) | Mid<br>(192) | Late<br>(177) |
| Term                                      | 53<br>(76%)   | 57<br>(79%) | 50<br>(82%)  | 141<br>(73%)   | 144<br>(75%) | 133<br>(75%)  |
| Moderate to late preterm<br>(32-37 weeks) | 8 (11%)       | 8 (11%)     | 9 (15%)      | 36<br>(19%)    | 34<br>(18%)  | 36<br>(20%)   |
| Very preterm (28-32<br>weeks)             | 5<br>(7.1%)   | 4<br>(5.6%) | 2<br>(3.3%)  | 7<br>(3.6%)    | 8<br>(4.2%)  | 5<br>(2.8%)   |
| Extremely preterm (< 28<br>weeks)         | 4<br>(5.7%)   | 3<br>(4.2%) | 0<br>(0%)    | 8<br>(4.2%)    | 6<br>(3.1%)  | 3<br>(1.7%)   |

58  
 59

60 **Table S3.** Mean gestational length for secretors and non-secretors and their vaginal  
 61 microbiomes through pregnancy. Sample sizes are included in brackets.

| Microbiome                        | Early (262)       |                          | Mid (264)         |                          | Late (238)        |                          |
|-----------------------------------|-------------------|--------------------------|-------------------|--------------------------|-------------------|--------------------------|
|                                   | Secretor<br>(192) | Non-<br>secretor<br>(70) | Secretor<br>(192) | Non-<br>secretor<br>(72) | Secretor<br>(177) | Non-<br>secretor<br>(61) |
| <i>Lactobacillus</i><br>dominated | 262.52<br>(151)   | 266.21<br>(57)           | 263.65<br>(153)   | 264.27<br>(60)           | 266.14<br>(133)   | 267.67<br>(48)           |
| <i>Lactobacillus</i><br>depleted  | 266.05<br>(41)    | 241.54<br>(13)           | 265.41<br>(39)    | 258.50<br>(12)           | 265.25<br>(44)    | 267.62<br>(13)           |
| CST 1                             | 265.81<br>(90)    | 270.46<br>(30)           | 266.18<br>(93)    | 265.35<br>(37)           | 267.76<br>(83)    | 266.27<br>(26)           |
| CST 2                             | 254.70<br>(10)    | 0.00 (0)                 | 260.17<br>(12)    | 266.00 (1)               | 249.57 (7)        | 266.00 (1)               |
| CST 3                             | 258.12<br>(49)    | 259.96<br>(27)           | 258.35<br>(48)    | 261.77<br>(17)           | 264.80<br>(45)    | 270.11<br>(19)           |
| CST 4                             | 266.25<br>(28)    | 242.11 (9)               | 268.96<br>(25)    | 255.00 (9)               | 268.59<br>(27)    | 268.50 (6)               |
| CST 5                             | 265.07<br>(15)    | 277.50 (4)               | 263.43<br>(14)    | 266.13 (8)               | 261.93<br>(15)    | 266.11 (9)               |

62

63

64 **Table S4.** Analysis of deviance results from generalised linear mixed effects modelling  
65 (GLMM) of gestational length (days) using *Lactobacillus* status (at three timepoints in  
66 pregnancy) and ethnicity as a random effect. †Significant in the model at  $\alpha=0.05$ . \*1  
67 Preterm birth. \*2 Mid trimester loss.

| Model         | Variable                                      | Chisq  | DF | P-value                        |
|---------------|-----------------------------------------------|--------|----|--------------------------------|
| Early (n=256) | Maternal age                                  | 0.145  | 1  | 0.704                          |
|               | BMI                                           | 1.795  | 1  | 0.180                          |
|               | Previous PTB <sup>*1</sup> /MTL <sup>*2</sup> | 31.886 | 1  | $1.652 \times 10^{-8\ddagger}$ |
|               | Cervical stitch                               | 13.879 | 1  | $1.950 \times 10^{-4\ddagger}$ |
|               | Previous cervical excisional treatment        | 1.986  | 1  | 0.159                          |
|               | Secretor                                      | 0.026  | 1  | 0.873                          |
|               | <i>Lactobacillus</i>                          | 0.205  | 1  | 0.650                          |
|               | Secretor $\times$ <i>Lactobacillus</i>        | 6.498  | 1  | 0.0108 <sup>†</sup>            |
| Mid (n=257)   | Maternal age                                  | 1.618  | 1  | 0.203                          |
|               | BMI                                           | 0.668  | 1  | 0.414                          |
|               | Previous PTB <sup>*1</sup> /MTL <sup>*2</sup> | 12.871 | 1  | $3.338 \times 10^{-4\ddagger}$ |
|               | Cervical stitch                               | 24.003 | 1  | $9.620 \times 10^{-7\ddagger}$ |
|               | Previous cervical excisional treatment        | 4.291  | 1  | 0.038 <sup>†</sup>             |
|               | Secretor                                      | 0.002  | 1  | 0.963                          |
|               | <i>Lactobacillus</i>                          | 2.005  | 1  | 0.157                          |
|               | Secretor $\times$ <i>Lactobacillus</i>        | 1.251  | 1  | 0.263                          |
| Late (n=232)  | Maternal age                                  | 2.541  | 1  | 0.111                          |
|               | BMI                                           | 0.380  | 1  | 0.537                          |
|               | Previous PTB <sup>*1</sup> /MTL <sup>*2</sup> | 12.058 | 1  | $5.157 \times 10^{-4\ddagger}$ |
|               | Cervical stitch                               | 6.857  | 1  | $8.828 \times 10^{-3\ddagger}$ |
|               | Previous cervical excisional treatment        | 1.818  | 1  | 0.178                          |
|               | Secretor                                      | 0.144  | 1  | 0.704                          |
|               | <i>Lactobacillus</i>                          | 0.716  | 1  | 0.394                          |
|               | Secretor $\times$ <i>Lactobacillus</i>        | 0.113  | 1  | 0.737                          |

68  
69  
70



71 **Table S5.** Analysis of deviance results from GLMMs of gestational length in days using  
72 two different definitions of *L. Dominated* vs *L. Depleted* status based on VALENCIA  
73 CSTs, or relative abundance of Genus *Lactobacillus* counts as a continuous covariate.  
74 All estimates reported are from models fitted on the early gestation timepoint.  
75 †Significant in the model at  $\alpha=0.05$ . \*1 Preterm birth. \*2 Mid trimester loss.

| <i>L. Dominated</i><br>definition | Variable                                                                                                                                                                       | Chisq                                         | DF                 | P-value                 |                         |
|-----------------------------------|--------------------------------------------------------------------------------------------------------------------------------------------------------------------------------|-----------------------------------------------|--------------------|-------------------------|-------------------------|
| <b>VALENCIA CST</b>               | Maternal age                                                                                                                                                                   | 0.252                                         | 1                  | 0.615                   |                         |
|                                   | BMI                                                                                                                                                                            | 1.291                                         | 1                  | 0.256                   |                         |
|                                   | <i>L. Dominated:</i><br>CST I, II, III, V                                                                                                                                      | Previous PTB* <sup>1</sup> /MTL* <sup>2</sup> | 29.727             | 1                       | 4.974×10 <sup>-8†</sup> |
|                                   |                                                                                                                                                                                | Cervical stitch                               | 13.076             | 1                       | 2.991×10 <sup>-4†</sup> |
|                                   | <i>L. Depleted:</i><br>All CST IV                                                                                                                                              | Previous cervical excisional<br>treatment     | 2.225              | 1                       | 0.136                   |
|                                   |                                                                                                                                                                                | Secretor                                      | 0.067              | 1                       | 0.797                   |
|                                   |                                                                                                                                                                                | <i>Lactobacillus</i>                          | 0.272              | 1                       | 0.602                   |
|                                   | Secretor × <i>Lactobacillus</i>                                                                                                                                                | 1.797                                         | 1                  | 0.180                   |                         |
| <b>Modified VALENCIA<br/>CST</b>  | Maternal age                                                                                                                                                                   | 0.248                                         | 1                  | 0.619                   |                         |
|                                   | BMI                                                                                                                                                                            | 1.150                                         | 1                  | 0.284                   |                         |
|                                   | Same as above, but<br>IV-C3 ( <i>B. breve</i> ) and<br>other IV cases where<br>a <i>Lactobacillus sp.</i> is<br>the majority taxon are<br>classified as <i>L.</i><br>Dominated | Previous PTB* <sup>1</sup> /MTL* <sup>2</sup> | 28.523             | 1                       | 9.260×10 <sup>-8†</sup> |
|                                   |                                                                                                                                                                                | Cervical stitch                               | 12.084             | 1                       | 5.086×10 <sup>-4†</sup> |
|                                   | Previous cervical excisional<br>treatment                                                                                                                                      | 2.293                                         | 1                  | 0.130                   |                         |
|                                   | Secretor                                                                                                                                                                       | 0.052                                         | 1                  | 0.819                   |                         |
|                                   | <i>Lactobacillus</i>                                                                                                                                                           | 0.032                                         | 1                  | 0.858                   |                         |
| Secretor × <i>Lactobacillus</i>   | 1.820                                                                                                                                                                          | 1                                             | 0.177              |                         |                         |
| <b><i>Lactobacillus</i> %</b>     | Maternal age                                                                                                                                                                   | 0.177                                         | 1                  | 0.674                   |                         |
|                                   | Relative abundance of<br><i>Lactobacillus</i> Genus<br>counts as a<br>continuous covariate                                                                                     | BMI                                           | 1.520              | 1                       | 0.218                   |
|                                   |                                                                                                                                                                                | Previous PTB* <sup>1</sup> /MTL* <sup>2</sup> | 30.207             | 1                       | 3.884×10 <sup>-8†</sup> |
|                                   | Cervical stitch                                                                                                                                                                | 12.667                                        | 1                  | 3.721×10 <sup>-4†</sup> |                         |
|                                   | Previous cervical excisional<br>treatment                                                                                                                                      | 2.261                                         | 1                  | 0.133                   |                         |
|                                   | Secretor                                                                                                                                                                       | 0.022                                         | 1                  | 0.881                   |                         |
|                                   | <i>Lactobacillus</i> %                                                                                                                                                         | 0.126                                         | 1                  | 0.723                   |                         |
| Secretor × <i>Lactobacillus</i> % | 5.098                                                                                                                                                                          | 1                                             | 0.024 <sup>†</sup> |                         |                         |

77 **Table S6.** Unstandardised coefficients (*b*) and 95% confidence intervals (CI) from  
78 gamma generalised linear mixed effects modelling (GLMM) of gestational length (in  
79 days) using two different definitions of *L. Dominated* vs *L. Depleted* status based on  
80 VALENCIA CSTs, or relative abundance of Genus *Lactobacillus* counts as a  
81 continuous covariate. All estimates reported are from models fitted on the early  
82 gestation timepoint. \*<sup>1</sup> Preterm birth. \*<sup>2</sup> Mid-trimester loss. \* p<0.05. \*\* p<0.01. \*\*\*  
83 p<0.001.

|                                               | VALENCIA<br>β (95% CI)      | Modified<br>VALENCIA CST<br>β (95% CI) | <i>Lactobacillus</i> %<br>β (95% CI) |
|-----------------------------------------------|-----------------------------|----------------------------------------|--------------------------------------|
| Intercept                                     | 3.285 (2.512,<br>4.058) *** | 3.264 (2.498,<br>4.031) ***            | 3.146 (2.365,<br>3.927) ***          |
| Maternal age                                  | 0.004 (-0.012,<br>0.021)    | 0.004 (-0.012,<br>0.021)               | 0.003 (-0.013,<br>0.020)             |
| BMI                                           | -0.011 (-0.030,<br>0.008)   | -0.010 (-0.029,<br>0.008)              | -0.012 (-0.030,<br>0.007)            |
| Previous PTB <sup>*1</sup> /MTL <sup>*2</sup> | 0.533 (0.342,<br>0.725) *** | 0.525 (0.332,<br>0.718) ***            | 0.530 (0.341,<br>0.719) ***          |
| Cervical stitch                               | 0.353 (0.162,<br>0.545) *** | 0.340 (0.148,<br>0.531) ***            | 0.347 (0.156,<br>0.537) ***          |
| Previous cervical<br>excisional treatment     | -0.149 (-0.345,<br>0.047)   | -0.151 (-0.347, -<br>0.045)            | -0.148 (-0.342,<br>0.045)            |
| Secretor × <i>Lactobacillus</i>               | 0.386 (-0.178,<br>0.949)    | 0.486 (-0.220,<br>1.192)               | -0.808 (-1.509,<br>-0.107) *         |

84  
85

86 **Table S7.** Analysis of deviance results from GLMMs of gestational length in days using  
 87 Community State Type (CST) (with ethnicity as a random effect) highlighting  
 88 covariates that are significant explanatory variables in the models. †Significant in the  
 89 model at  $\alpha=0.05$ . \*1 Preterm birth. \*2 Mid trimester loss.

| Model                                         | Variable                                      | Chisq        | DF    | P-value                  |
|-----------------------------------------------|-----------------------------------------------|--------------|-------|--------------------------|
| Early (n=256)                                 | Maternal age                                  | 0.432        | 1     | 0.511                    |
|                                               | BMI                                           | 1.425        | 1     | 0.233                    |
|                                               | Previous PTB* <sup>1</sup> /MTL* <sup>2</sup> | 27.490       | 1     | 1.579×10 <sup>-7</sup> † |
|                                               | Cervical stitch                               | 14.141       | 1     | 1.696×10 <sup>-4</sup> † |
|                                               | Previous cervical excisional treatment        | 2.314        | 1     | 0.128                    |
|                                               | Secretor                                      | 0.065        | 1     | 0.798                    |
|                                               | CST                                           | 1.941        | 4     | 0.747                    |
|                                               | Secretor × CST                                | 4.602        | 3     | 0.203                    |
|                                               | Mid (n=257)                                   | Maternal age | 2.118 | 1                        |
| BMI                                           |                                               | 1.135        | 1     | 0.287                    |
| Previous PTB* <sup>1</sup> /MTL* <sup>2</sup> |                                               | 12.658       | 1     | 3.739×10 <sup>-4</sup> † |
| Cervical stitch                               |                                               | 23.282       | 1     | 1.399×10 <sup>-6</sup> † |
| Previous cervical excisional treatment        |                                               | 4.595        | 1     | 0.0321†                  |
| Secretor                                      |                                               | 0.0001       | 1     | 0.992                    |
| CST                                           |                                               | 4.520        | 4     | 0.340                    |
| Secretor × CST                                |                                               | 3.766        | 4     | 0.439                    |
| Late (n=232)                                  |                                               | Maternal age | 2.041 | 1                        |
|                                               | BMI                                           | 0.495        | 1     | 0.482                    |
|                                               | Previous PTB* <sup>1</sup> /MTL* <sup>2</sup> | 10.793       | 1     | 1.019×10 <sup>-3</sup> † |
|                                               | Cervical stitch                               | 7.559        | 1     | 5.972×10 <sup>-3</sup> † |
|                                               | Previous cervical excisional treatment        | 2.185        | 1     | 0.139†                   |
|                                               | Secretor                                      | 0.164        | 1     | 0.686                    |
|                                               | CST                                           | 4.761        | 4     | 0.313                    |
|                                               | Secretor × CST                                | 0.706        | 4     | 0.951                    |

91 **Table S8.** Unstandardised coefficients (*b*), and 95% confidence intervals (CI) from GLMMs of gestational length and incorporating  
 92 ABO status (as an additional independent variable). Blood group A, Secretors with *Lactobacillus* dominated microbiota are baseline  
 93 in the model. \*<sup>1</sup> Preterm birth. \*<sup>2</sup> Mid-trimester loss. \*  $p < 0.05$ . \*\*  $p < 0.01$ . \*\*\*  $p < 0.001$ .

|                                               | Early (n=197)            | Mid (n=195)              | Late (n=175)             |
|-----------------------------------------------|--------------------------|--------------------------|--------------------------|
|                                               | $\beta$ (95% CI)         | $\beta$ (95% CI)         | $\beta$ (95% CI)         |
| Intercept                                     | 3.567 (2.635, 4.499) *** | 3.320 (2.385, 4.256) *** | 2.929 (1.967, 3.892) *** |
| Maternal age                                  | 0.002 (-0.018, 0.022)    | 0.005 (-0.015, 0.024)    | 0.011 (-0.010, 0.031)    |
| BMI                                           | -0.021 (-0.043, 0.001)   | -0.018 (-0.038, 0.002)   | -0.010 (-0.030, 0.010)   |
| Previous PTB <sup>*1</sup> /MTL <sup>*2</sup> | 0.578 (0.350, 0.805) *** | 0.398 (0.172, 0.624) *** | 0.300 (0.071, 0.530) *   |
| Cervical stitch                               | 0.363 (0.130, 0.597) **  | 0.454 (0.255, 0.653) *** | 0.283 (0.079, 0.487) **  |
| Previous cervical excisional treatment        | -0.100 (-0.325, 0.126)   | -0.075 (-0.306, 0.155)   | -0.062 (-0.288, 0.164)   |
| ABO (AB)                                      | -0.179 (-0.672, 0.314)   | 0.041 (-0.438, 0.520)    | 0.072 (-0.379, 0.524)    |
| ABO (B)                                       | 0.188 (-0.095, 0.470)    | 0.397 (0.126, 0.669) **  | 0.309 (0.031, 0.588) *   |
| ABO (O)                                       | -0.057 (-0.277, 0.163)   | -0.021 (-0.230, 0.188)   | -0.025 (-0.242, 0.191)   |
| Secretor $\times$ <i>Lactobacillus</i>        | 0.690 (0.161, 1.220) *   | 0.103 (-0.439, 0.645)    | -0.051 (-0.591, 0.489)   |
